# Supplementary material
Source: PubMed Central journal article supplement (PMC9071567)
Supplement: iyac044_table_s1.pdf [file iyac044_table_s1.pdf]

**Table S1** Potential scale reduction factor point estimates (PSRF), their upper confidence intervals (C.I.) and effective sample sizes ( $N_{eff}$ ) for ARGweaver stats.  $\mu$ : mutation rate,  $\rho$ : recombination rate.

|              | $\mu = \rho = 2 \times 10^{-8}$ |      |           | $\rho = 2 \times 10^{-9}$ |      |           | $\mu = 2 \times 10^{-7}$ |      |           |
|--------------|---------------------------------|------|-----------|---------------------------|------|-----------|--------------------------|------|-----------|
|              | PSRF                            | C.I. | $N_{eff}$ | PSRF                      | C.I. | $N_{eff}$ | PSRF                     | C.I. | $N_{eff}$ |
| prior        | 1.06                            | 1.15 | 224       | 1.01                      | 1.03 | 494       | 1.00                     | 1.01 | 216       |
| likelihood   | 1.02                            | 1.05 | 294       | 1.04                      | 1.11 | 964       | 1.01                     | 1.02 | 499       |
| joint        | 1.06                            | 1.16 | 216       | 1.01                      | 1.02 | 486       | 1.01                     | 1.02 | 219       |
| recombs      | 1.04                            | 1.1  | 254       | 1.01                      | 1.03 | 559       | 1.00                     | 1.01 | 229       |
| noncompats   | 1.02                            | 1.04 | 406       | 1.01                      | 1.03 | 1290      | 1.01                     | 1.04 | 518       |
| arglen       | 1.06                            | 1.16 | 348       | 1.08                      | 1.21 | 459       | 1.05                     | 1.12 | 319       |
| Multivariate | 1.15                            |      |           | 1.1                       |      |           | 1.05                     |      |           |
