# Supplementary material
Source: PubMed Central journal article supplement (PMC9071567)
Supplement: iyac044_table_s2.pdf [file iyac044_table_s2.pdf]

**Table S2** Potential scale reduction factor (PSRF) mean, variance and range for each of 200 coalescence times in ARGweaver, the multivariate PSRF (Plummer *et al.* 2006) and the number of coalescence times for each the effective sample size ( $N_{eff}$ ) is smaller than 100. Unless otherwise noted, mutation rate ( $\mu$ ) and recombination rate ( $\rho$ ) are  $2 \times 10^{-8}$  and sample sizes (n) are 8 haplotypes.

| PSRF                                                         | $\mu = \rho$     | $\rho = 2 \times 10^{-9}$ | $\mu = 2 \times 10^{-7}$ | n=4              | n=16             | n=32                           |
|--------------------------------------------------------------|------------------|---------------------------|--------------------------|------------------|------------------|--------------------------------|
| Mean                                                         | 1.055            | 1.069                     | 1.211                    | 1.028            | 1.242            | 244.152                        |
| Variance                                                     | 0.005            | 0.010                     | 1.053                    | 0.001            | 0.233            | 11613699                       |
| Range                                                        | 0.994 -<br>1.415 | 0.994 -<br>1.709          | 0.994 -<br>13.740        | 0.991 -<br>1.199 | 1.001 -<br>4.847 | 0.994 -<br>$4.783 \times 10^4$ |
| Multivariate<br>Number of<br>$N_{eff} < 100$<br>(out of 200) | 4.92<br>4        | 4.29<br>16                | 21.2<br>14               | 2.78<br>0        | 24.9<br>32       | 110560<br>45                   |
