# Supplementary material
Source: PubMed Central journal article supplement (PMC9071567)
Supplement: iyac044_table_s3.pdf [file iyac044_table_s3.pdf]

**Table S3** Potential scale reduction factor (PSRF) mean, variance and range for each of 200 coalescence times in Relate, the multi-variate PSRF (Plummer *et al.* 2006) and the number of coalescence times for each the effective sample size ( $N_{eff}$ ) is smaller than 100. Unless otherwise noted, mutation rate ( $\mu$ ) and recombination rate ( $\rho$ ) are  $2 \times 10^{-8}$  and sample sizes (n) are 8 haplotypes.

| PSRF                                         | $\mu = \rho$     | $\rho = 2 \times 10^{-9}$ | $\mu = 2 \times 10^{-7}$ | n=4              | n=16             | n=32             |
|----------------------------------------------|------------------|---------------------------|--------------------------|------------------|------------------|------------------|
| Mean                                         | 1.007            | 1.007                     | 1.008                    | 1.008            | 1.009            | 1.008            |
| Variance                                     | $10^{-4}$        | $8.7 \times 10^{-5}$      | $10^{-4}$                | $10^{-4}$        | $10^{-4}$        | $10^{-4}$        |
| Range                                        | 0.991 -<br>1.076 | 0.993 -<br>1.051          | 0.992 -<br>1.051         | 0.991 -<br>1.102 | 0.992 -<br>1.061 | 0.993 -<br>1.049 |
| Multivariate                                 | 2.24             | 2.12                      | 2.57                     | 2.24             | 3.31             | 2.49             |
| Number of<br>$N_{eff} < 100$<br>(out of 200) | 0                | 0                         | 0                        | 0                | 0                | 0                |
