# Supplementary material
Source: PubMed Central journal article supplement (PMC9071567)
Supplement: iyac044_table_s4.pdf [file iyac044_table_s4.pdf]

**Table S4** Minimum and maximum acceptance rates of ARGweaver subtree sampling steps for each simulation.

| Simulation                                             | Acceptance rates |       |
|--------------------------------------------------------|------------------|-------|
|                                                        | Min              | Max   |
| $n=8; \mu = \rho = 2 \times 10^{-8}$                   | 0.283            | 0.532 |
| $n=8; \mu = 2 \times 10^{-8}; \rho = 2 \times 10^{-9}$ | 0.838            | 0.965 |
| $n=8; \mu = 2 \times 10^{-7}; \rho = 2 \times 10^{-8}$ | 0.345            | 0.582 |
| $n=4; \mu = \rho = 2 \times 10^{-8}$                   | 0.262            | 0.511 |
| $n=16; \mu = \rho = 2 \times 10^{-8}$                  | 0.299            | 0.567 |
| $n=32; \mu = \rho = 2 \times 10^{-8}$                  | 0.307            | 0.568 |
