# Supplementary material
Source: PubMed Central journal article supplement (PMC9071567)
Supplement: iyac044_table_s5.pdf [file iyac044_table_s5.pdf]

**Table S5** Comparison of ARGweaver results with simulations under infinite sites mutational model and Jukes-Cantor finite sites mutational model, including simulations with values of mutation to recombination rate ratio in between the ones shown in the main text. \* indicate results shown in the main text and presented here again for comparison.

| $\mu/\rho$                                       | Point estimates (MSE) |                   | Ranks (KLD)    |                   |
|--------------------------------------------------|-----------------------|-------------------|----------------|-------------------|
|                                                  | Infinite sites        | Finite sites (JC) | Infinite sites | Finite sites (JC) |
| $\frac{2 \times 10^{-8}}{2 \times 10^{-8}} = 1$  | 0.397*                | 0.396             | 0.027*         | 0.026             |
| $\frac{4 \times 10^{-8}}{2 \times 10^{-8}} = 2$  | 0.285                 | 0.285             | 0.049          | 0.053             |
| $\frac{8 \times 10^{-8}}{2 \times 10^{-8}} = 4$  | 0.195                 | 0.197             | 0.113          | 0.112             |
| $\frac{2 \times 10^{-7}}{2 \times 10^{-8}} = 10$ | 0.117*                | 0.120             | 0.350*         | 0.353             |
| $\frac{2 \times 10^{-8}}{2 \times 10^{-9}} = 10$ | 0.120*                | 0.119             | 0.286*         | 0.291             |
